# Supplementary material for: Modelling the chemical repair of protein carbon-centered radicals formed via oxidative damage with dihydrolipoic acid
Source: Royal Society of Chemistry journal article supplement (doi:10.1039/c5ra20618a), 2015-01-01
Supplement: c5ra20618a1.pdf [file c5ra20618a1.pdf]

# Modelling the Chemical Repair of Protein Carbon-Centered Radicals Formed via Oxidative Damaged with Dihydrolipoic Acid

Romina Castañeda-Arriaga<sup>1</sup>, Nelaine Mora-Diez<sup>2</sup> and J. Raul Alvarez-Idaboy<sup>1\*</sup>

<sup>1</sup>Facultad de Química, Departamento de Física y Química Teórica, Universidad Nacional Autónoma de México, México DF 04510, Mexico.

<sup>2</sup>Department of Chemistry, Thompson Rivers University, Kamloops, BC, V2C 0C8, Canada.

## Supplementary Information

(21 pages)

### Contents:

Table S1.  $\langle S^2 \rangle$  values for the calculated transition states in the two solvents studied.

Table S2. Calculated rate constants ( $k$  and  $k_D$  in  $M^{-1} s^{-1}$ ) for the repair reactions of N-formyl-leucinamide in two solvents at 298.15 K.

Figure S1. Optimized structures of the N-formyl-leucinamide radicals

Figure S2. Optimized geometry of the TSs (repaired radicals with the S(1) site of DHL)

Figure S3. Optimized geometry of the TSs (repaired radicals with the S(2) site of DHL)

Figure S4. Optimized structures of the reaction products

M06-2X/6-31++G(d,p) Cartesian coordinates of the optimized geometries of the different reactants, products and TSs calculated in this study.

**Table S1.**  $\langle S^2 \rangle$  values for the calculated transition states in the two solvents studied.

| Radical            | Solvent:<br>water | Solvent:<br>pentyl ethanoate |
|--------------------|-------------------|------------------------------|
| Repaired with S(1) |                   |                              |
| $\alpha$           | 0.759             | 0.759                        |
| $\beta$            | 0.759             | 0.759                        |
| $\gamma$           | 0.758             | 0.758                        |
| $\delta$           | 0.759             | 0.759                        |
| Repaired with S(2) |                   |                              |
| $\alpha$           | 0.759             | 0.758                        |
| $\beta$            | 0.759             | 0.759                        |
| $\gamma$           | 0.758             | 0.758                        |
| $\delta$           | 0.759             | 0.759                        |

**Table S2.** Calculated rate constants ( $k$  and  $k_D$  in  $M^{-1} s^{-1}$ ) for the repair reactions of N-formyl-leucinamide in two solvents at 298.15 K.<sup>a</sup>

| Radical            | Solvent: water       |                   | Solvent: pentyl ethanoate |                   |
|--------------------|----------------------|-------------------|---------------------------|-------------------|
|                    | $k$                  | $k_D$             | $k$                       | $k_D$             |
| Repaired with S(1) |                      |                   |                           |                   |
| $\alpha$           | $7.6 \times 10^4$    | $2.3 \times 10^9$ | $2.4 \times 10^4$         | $2.4 \times 10^9$ |
| $\beta$            | $1.7 \times 10^7$    | $2.4 \times 10^9$ | $1.1 \times 10^8$         | $2.4 \times 10^9$ |
| $\gamma$           | $1.5 \times 10^7$    | $2.3 \times 10^9$ | $1.5 \times 10^6$         | $2.5 \times 10^9$ |
| $\delta$           | $1.5 \times 10^9$    | $2.4 \times 10^9$ | $3.1 \times 10^7$         | $2.5 \times 10^9$ |
| Repaired with S(2) |                      |                   |                           |                   |
| $\alpha$           | $3.1 \times 10^5$    | $2.3 \times 10^9$ | $8.4 \times 10^5$         | $2.5 \times 10^9$ |
| $\beta$            | $6.8 \times 10^{10}$ | $2.4 \times 10^9$ | $2.5 \times 10^6$         | $2.4 \times 10^9$ |
| $\gamma$           | $2.4 \times 10^9$    | $2.3 \times 10^9$ | $4.4 \times 10^7$         | $2.5 \times 10^9$ |
| $\delta$           | $1.8 \times 10^9$    | $2.4 \times 10^9$ | $1.1 \times 10^9$         | $2.5 \times 10^9$ |

<sup>a</sup>  $k$  is the non-corrected thermal rate constant and  $k_D$  is the diffusion-controlled rate constant.

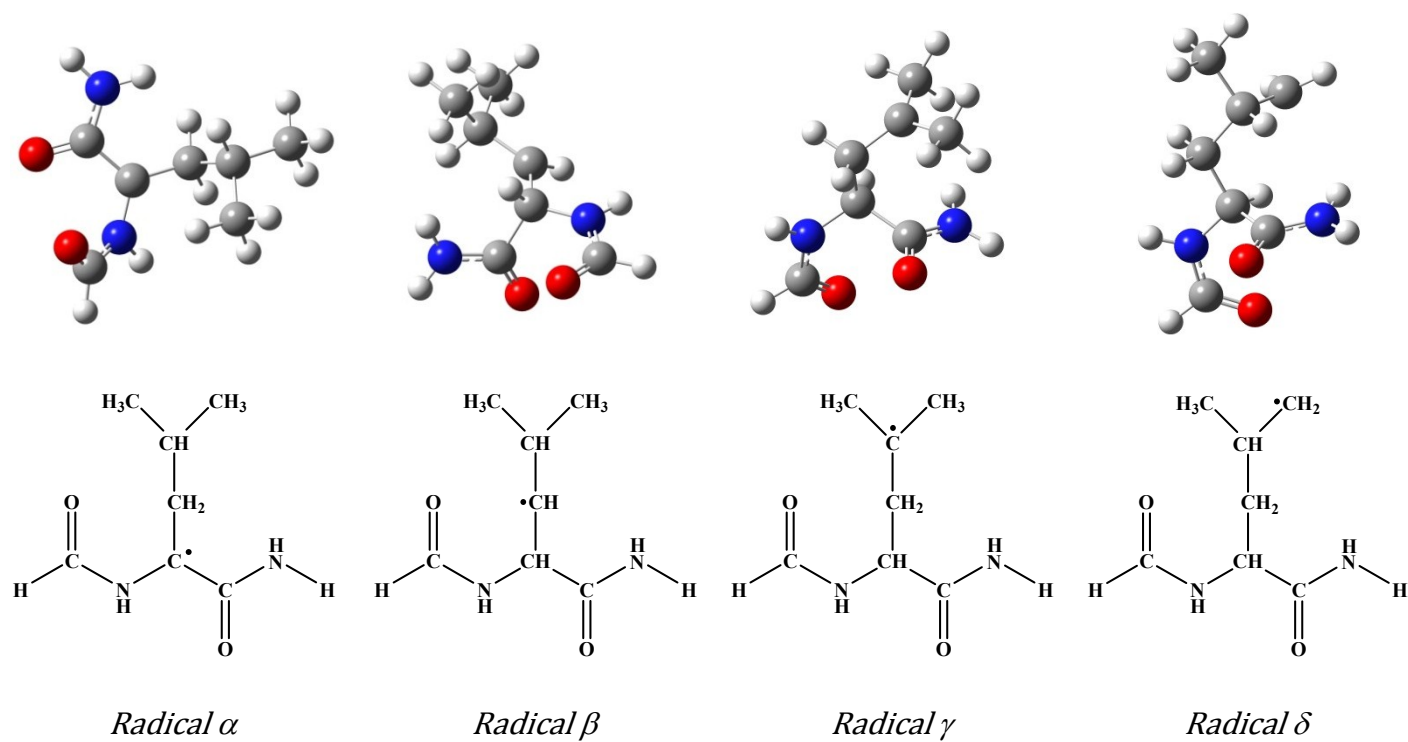

**Figure S1.** Optimized structures of the N-formyl-leucinamide radicals

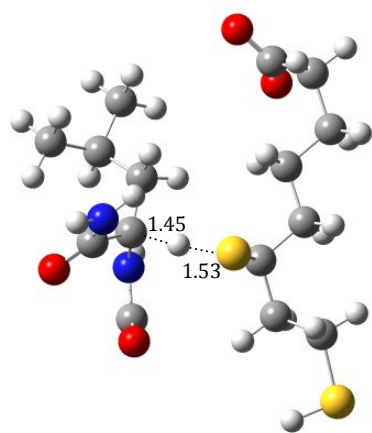

A. TS -  $\alpha(1)$

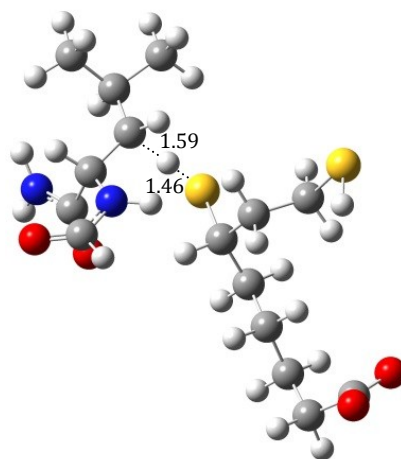

B. TS -  $\beta(1)$

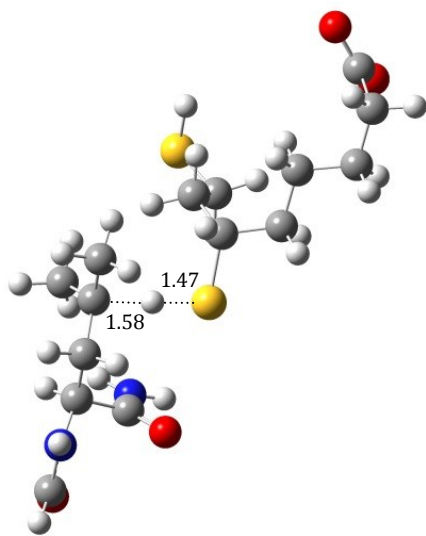

C. TS -  $\gamma(1)$

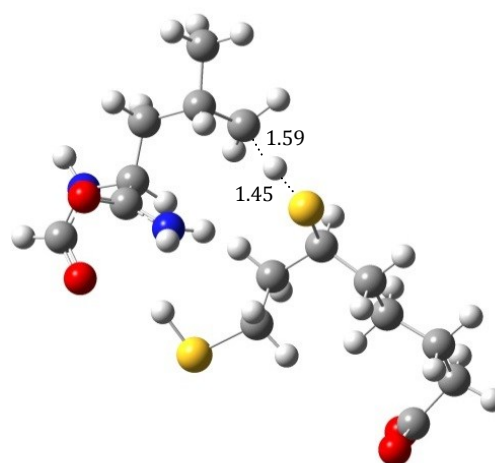

D. TS -  $\delta(1)$

**Figure S2.** Optimized geometry of the TSs (repaired radicals with the S(1) site of DHL)

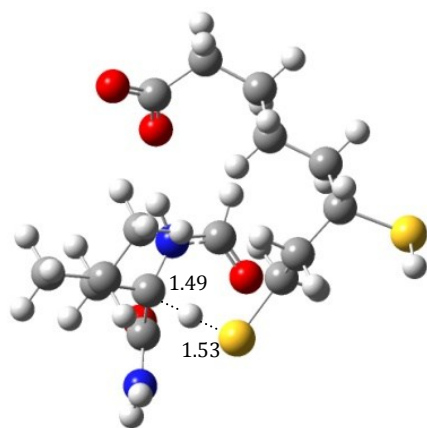

A. TS -  $\alpha(2)$

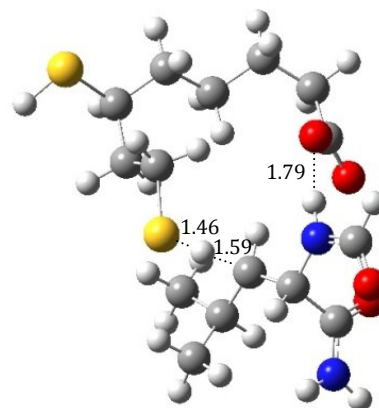

B. TS -  $\beta(2)$

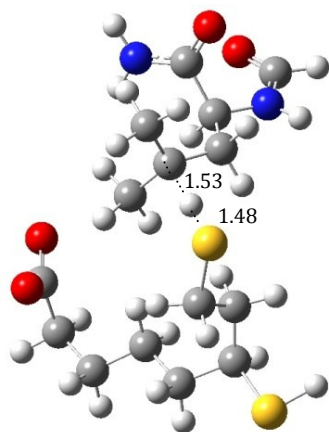

C. TS -  $\gamma(2)$

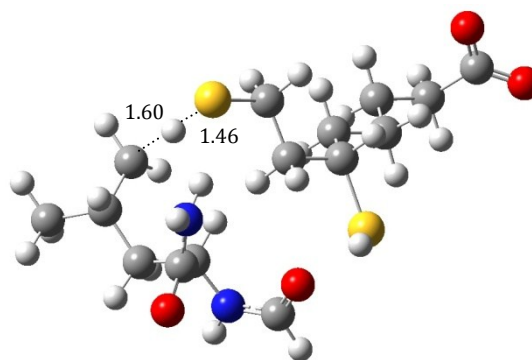

D. TS -  $\delta(2)$

**Figure S3.** Optimized geometry of the TSs (repaired radicals with the S(2) site of DHL)

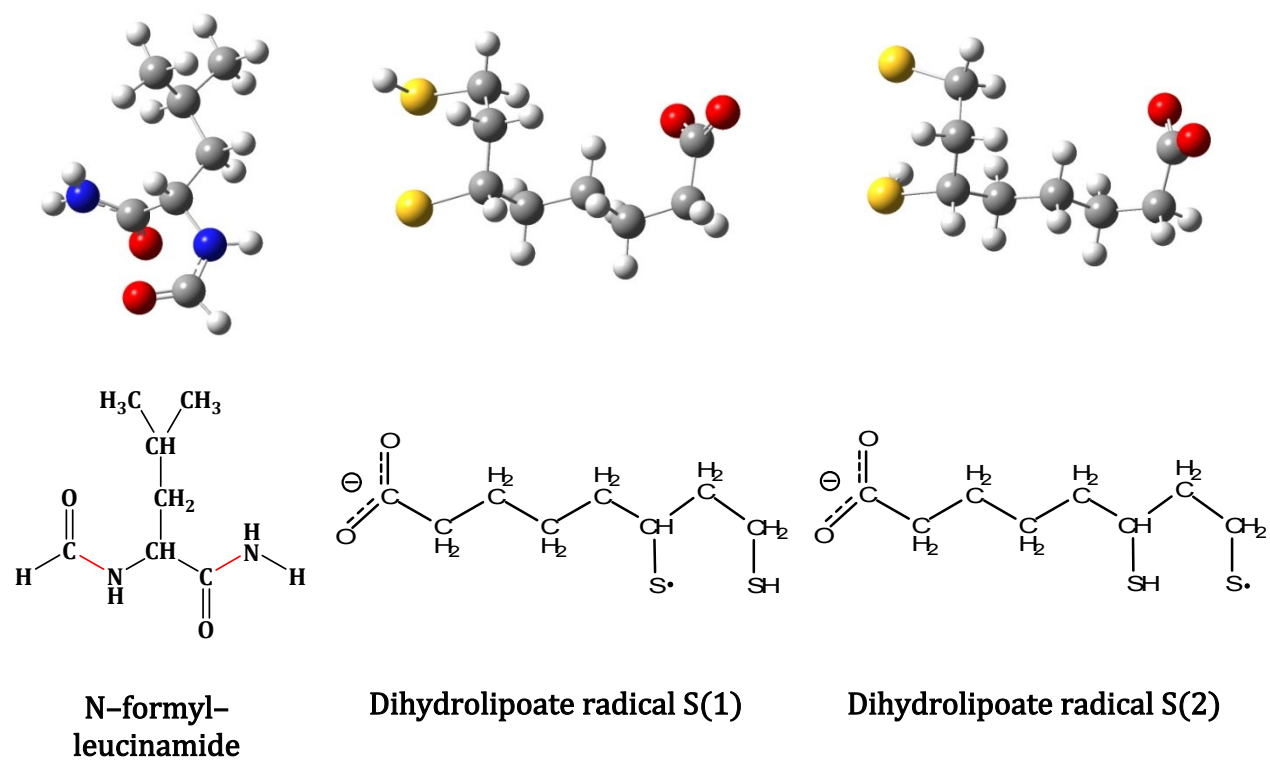

**Figure S4.** Optimized structures of the reaction products

**M06-2X/6-31++G(d,p) Cartesian coordinates of the optimized geometries of the different reactants, products and TSs calculated in this study.**

**Radical  $\alpha$**

Charge = 0 Multiplicity = 2

|   |             |             |             |
|---|-------------|-------------|-------------|
| N | 0.70588000  | 2.29624400  | -0.59849600 |
| H | -0.28288700 | 2.35050400  | -0.79805000 |
| H | 1.31134700  | 3.02965700  | -0.94173000 |
| C | 1.26949500  | 1.23606500  | 0.02109800  |
| O | 2.50469100  | 1.16030000  | 0.18449100  |
| C | 0.35608900  | 0.21591000  | 0.53932800  |
| N | 0.88952000  | -1.00930000 | 0.90929600  |
| H | 0.44140400  | -1.49283700 | 1.68432200  |
| C | 1.74404500  | -1.76852000 | 0.16502400  |
| O | 2.15573700  | -1.46731000 | -0.95052900 |
| H | 2.02077800  | -2.70557300 | 0.66439000  |
| C | -1.08831400 | 0.45555600  | 0.82632200  |
| H | -1.25512500 | 1.51175900  | 1.06252300  |
| H | -1.36809000 | -0.12423700 | 1.71715900  |
| C | -2.03451500 | 0.03874300  | -0.32831100 |
| H | -1.79099500 | 0.65091500  | -1.20696800 |
| C | -3.47639600 | 0.32958800  | 0.08164600  |
| H | -3.75541100 | -0.27462900 | 0.95321500  |
| H | -4.16642300 | 0.08710000  | -0.73258600 |
| H | -3.61257500 | 1.38421100  | 0.34188800  |
| C | -1.85843900 | -1.43104700 | -0.70368700 |
| H | -0.85494500 | -1.63994000 | -1.08887800 |
| H | -2.57822100 | -1.71245600 | -1.47884900 |
| H | -2.03187500 | -2.07477300 | 0.16775000  |

**Radical  $\beta$**

Charge = 0 Multiplicity = 2

|   |             |             |             |
|---|-------------|-------------|-------------|
| N | -0.49537100 | 2.09344500  | 0.43689400  |
| H | 0.00164500  | 1.94057900  | 1.30465900  |
| H | -0.70545900 | 3.04123800  | 0.14990100  |
| C | -0.84634300 | 1.07072100  | -0.35084400 |
| O | -1.46292700 | 1.21206100  | -1.41266800 |
| C | -0.35101100 | -0.31246000 | 0.12019200  |
| H | -0.26305500 | -0.28478500 | 1.21261800  |
| N | -1.30560500 | -1.33840900 | -0.25463700 |
| H | -1.02532500 | -2.06501800 | -0.90300300 |
| C | -2.58038900 | -1.27813400 | 0.14602700  |
| O | -3.01840400 | -0.39295600 | 0.89132500  |
| H | -3.21282100 | -2.09006900 | -0.23489300 |
| C | 0.97567800  | -0.57889100 | -0.51982500 |

|   |            |             |             |
|---|------------|-------------|-------------|
| H | 0.94587000 | -0.97631300 | -1.53309100 |
| C | 2.24423300 | 0.05132600  | -0.03672100 |
| H | 2.21622600 | 1.12733800  | -0.28508900 |
| C | 3.43968300 | -0.56361700 | -0.76840500 |
| H | 3.52609600 | -1.62939800 | -0.52785800 |
| H | 4.36946700 | -0.07013400 | -0.47090600 |
| H | 3.33165100 | -0.46722400 | -1.85310500 |
| C | 2.42385000 | -0.06684000 | 1.48188100  |
| H | 1.64079000 | 0.45745800  | 2.03755400  |
| H | 3.38478600 | 0.36511000  | 1.77723500  |
| H | 2.41339800 | -1.11950000 | 1.78709200  |

### Radical $\gamma$

Charge = 0 Multiplicity = 2

|   |             |             |             |
|---|-------------|-------------|-------------|
| N | 0.00201100  | 1.68274500  | 1.00690700  |
| H | 0.25202100  | 1.21429300  | 1.86762500  |
| H | 0.11902800  | 2.68608100  | 0.93962100  |
| C | -0.40295800 | 0.99222500  | -0.06411700 |
| O | -0.70916500 | 1.52837400  | -1.13730600 |
| C | -0.40510600 | -0.52988700 | 0.09112500  |
| H | -0.35862100 | -0.77898300 | 1.15730700  |
| N | -1.60999800 | -1.09941700 | -0.48302900 |
| H | -1.52906900 | -1.74937700 | -1.25669300 |
| C | -2.82995200 | -0.72511000 | -0.08274500 |
| O | -3.02845000 | 0.10342100  | 0.81467000  |
| H | -3.65231800 | -1.21740600 | -0.61752800 |
| C | 0.82266600  | -1.12222600 | -0.63763200 |
| H | 0.70147400  | -0.92337100 | -1.70941100 |
| H | 0.77497800  | -2.20903900 | -0.48550900 |
| C | 2.13139800  | -0.58416800 | -0.15073400 |
| C | 2.77098300  | 0.57015400  | -0.85177600 |
| H | 3.86125900  | 0.54384100  | -0.73895000 |
| H | 2.44036300  | 1.53824300  | -0.43795200 |
| H | 2.53198400  | 0.57715500  | -1.91994700 |
| C | 2.57090400  | -0.90999900 | 1.23960600  |
| H | 2.20705400  | -1.89229800 | 1.55952900  |
| H | 3.66383100  | -0.89963400 | 1.32250500  |
| H | 2.19723600  | -0.17309400 | 1.97097600  |

### Radical $\delta$

Charge = 0 Multiplicity = 2

|   |             |            |             |
|---|-------------|------------|-------------|
| N | 0.37105300  | 2.06339700 | -0.29274900 |
| H | -0.01782400 | 1.96465400 | -1.22185500 |
| H | 0.46067100  | 2.98827200 | 0.10904900  |
| C | 0.66399200  | 0.99055800 | 0.45030900  |



|   |             |             |             |
|---|-------------|-------------|-------------|
| O | 1.11176400  | 1.06907200  | 1.60165700  |
| C | 0.36964500  | -0.36508300 | -0.19999100 |
| H | 0.33947000  | -0.22818000 | -1.28634300 |
| N | 1.42131200  | -1.31130400 | 0.12448100  |
| H | 1.20579200  | -2.11614700 | 0.70178600  |
| C | 2.69705500  | -1.07651500 | -0.20218900 |
| O | 3.06567100  | -0.08146600 | -0.83888700 |
| H | 3.40074000  | -1.84793000 | 0.13564100  |
| C | -0.97382400 | -0.91564500 | 0.29331800  |
| H | -0.89987800 | -1.11077000 | 1.37010500  |
| H | -1.13983700 | -1.87730700 | -0.20870800 |
| C | -2.16961200 | 0.00477200  | 0.02004000  |
| H | -2.03568900 | 0.93814200  | 0.58287900  |
| C | -3.45602300 | -0.66182200 | 0.54010900  |
| H | -3.63504400 | -1.60679500 | 0.01582800  |
| H | -4.31973200 | -0.01075200 | 0.37770400  |
| H | -3.37734600 | -0.87091300 | 1.61250400  |
| C | -2.29815200 | 0.32906300  | -1.43322700 |
| H | -2.13323200 | -0.44973000 | -2.17315500 |
| H | -2.81261200 | 1.22998800  | -1.74993200 |

### Dihydrolipoate

Charge = -1 Multiplicity = 1

|   |             |             |             |
|---|-------------|-------------|-------------|
| C | 3.39553800  | -1.28183200 | -0.00250900 |
| H | 4.18892700  | -1.77661300 | -0.57697700 |
| H | 3.55028100  | -1.53960900 | 1.04983700  |
| C | 2.02826800  | -1.76955900 | -0.47796000 |
| H | 1.98507900  | -2.86178100 | -0.39021200 |
| H | 1.90351600  | -1.53172200 | -1.54112700 |
| C | 0.87950800  | -1.15163000 | 0.31766600  |
| H | 0.96318400  | -0.05750500 | 0.27512500  |
| H | 0.97115900  | -1.43489200 | 1.37545400  |
| C | -0.48561300 | -1.58796800 | -0.21251100 |
| H | -0.52878700 | -2.68397100 | -0.23142200 |
| C | -1.65226100 | -1.06733500 | 0.63209800  |
| C | -1.66782700 | 0.45465200  | 0.81996300  |
| H | -0.81416500 | 0.72410800  | 1.45487400  |
| H | -2.57030700 | 0.74056600  | 1.37166100  |
| H | -1.59637900 | -1.52796700 | 1.62299700  |
| C | 3.60538100  | 0.22474400  | -0.17467900 |
| O | 3.18781400  | 0.76369400  | -1.24069300 |
| O | 4.21138400  | 0.84471200  | 0.74829500  |
| C | -1.59279700 | 1.24622900  | -0.47946200 |
| H | -0.67470700 | 1.02966600  | -1.03048600 |
| H | -2.43748400 | 1.00893700  | -1.13224700 |

|   |             |             |             |
|---|-------------|-------------|-------------|
| H | -0.59571400 | -1.25063200 | -1.25174600 |
| S | -1.68967000 | 3.05277900  | -0.21324200 |
| H | -0.58961400 | 3.15409400  | 0.55228000  |
| S | -3.20517600 | -1.68401500 | -0.14942600 |
| H | -4.04952200 | -1.19646700 | 0.77548900  |

### TS - $\alpha(1)$

Charge = -1 Multiplicity = 2

|   |             |             |             |
|---|-------------|-------------|-------------|
| N | -0.10251000 | -3.32230400 | 2.07062300  |
| H | -0.43124300 | -2.47453700 | 2.51356500  |
| H | -0.02365800 | -4.16293400 | 2.62854400  |
| C | 0.14016600  | -3.39706300 | 0.75289000  |
| O | 0.51017500  | -4.43931200 | 0.19921700  |
| C | -0.07688800 | -2.11828800 | -0.02166700 |
| N | 0.52609400  | -2.08756500 | -1.28858100 |
| H | 0.01281700  | -1.64709500 | -2.04795900 |
| C | 1.84884700  | -2.31731300 | -1.51238600 |
| O | 2.64563000  | -2.65626800 | -0.64384600 |
| H | 2.14145500  | -2.16386700 | -2.55876600 |
| C | -1.43780200 | -1.45699400 | 0.02337900  |
| H | -1.31267200 | -0.43783100 | -0.36082700 |
| H | -1.76264300 | -1.36326600 | 1.06671800  |
| C | -2.55021900 | -2.15120000 | -0.78733600 |
| H | -2.18662700 | -2.31076800 | -1.81137700 |
| C | -3.75299500 | -1.20944200 | -0.84696400 |
| H | -4.13372100 | -1.01172700 | 0.16236800  |
| H | -4.56497800 | -1.64992800 | -1.43397700 |
| H | -3.48260500 | -0.24932300 | -1.29979200 |
| C | -2.94523100 | -3.50112600 | -0.19084600 |
| H | -2.11757000 | -4.21715100 | -0.19568100 |
| H | -3.76643000 | -3.94333500 | -0.76374500 |
| H | -3.28542900 | -3.37630400 | 0.84436900  |
| C | -3.01027200 | 3.49220400  | 0.88188200  |
| H | -3.45364300 | 4.48445800  | 1.03657600  |
| H | -3.17467400 | 2.92130500  | 1.80106500  |
| C | -1.51485900 | 3.62736500  | 0.60087400  |
| H | -1.04093500 | 4.13944200  | 1.44747600  |
| H | -1.35908500 | 4.26146900  | -0.28014400 |
| C | -0.83908700 | 2.27480600  | 0.38423200  |
| H | -1.27759100 | 1.79140100  | -0.50010800 |
| H | -1.05092800 | 1.62005700  | 1.24034700  |
| C | 0.66981200  | 2.38878000  | 0.19048600  |
| H | 1.11958500  | 2.87782200  | 1.06475500  |
| C | 1.36275700  | 1.04687500  | -0.07366800 |
| C | 2.77204800  | 1.20369100  | -0.65947000 |
| H | 2.68304900  | 1.69325900  | -1.63734200 |

|   |             |             |             |
|---|-------------|-------------|-------------|
| H | 3.20122900  | 0.20905600  | -0.82748400 |
| H | 0.76423700  | 0.49627400  | -0.81078100 |
| C | -3.80826000 | 2.83640100  | -0.24754100 |
| O | -3.49749600 | 3.11795900  | -1.44166100 |
| O | -4.76455000 | 2.07331100  | 0.07844400  |
| C | 3.70576600  | 2.02124600  | 0.22451900  |
| H | 3.37370000  | 3.06063900  | 0.29309100  |
| H | 3.74417300  | 1.61605800  | 1.23965500  |
| H | 0.87345600  | 3.03888000  | -0.67250400 |
| S | 5.40833100  | 2.12066200  | -0.43301500 |
| H | 5.66060700  | 0.80079000  | -0.40450300 |
| S | 1.38267100  | -0.00489500 | 1.44365200  |
| H | 0.69623000  | -1.19121000 | 0.77445000  |

### TS - $\beta(1)$

Charge = -1 Multiplicity = 2

|   |             |             |             |
|---|-------------|-------------|-------------|
| N | -4.00979000 | -1.96944000 | -1.27798400 |
| H | -4.89300800 | -1.52358800 | -1.06825000 |
| H | -3.94668000 | -2.57103000 | -2.08983100 |
| C | -2.93198700 | -1.80421300 | -0.50128500 |
| O | -1.86288500 | -2.38430000 | -0.70201800 |
| C | -3.11552800 | -0.82463300 | 0.67862800  |
| H | -4.11255800 | -1.02271500 | 1.10025900  |
| N | -2.13624300 | -1.10021500 | 1.70883900  |
| H | -1.32747200 | -0.49383700 | 1.79676300  |
| C | -2.10687200 | -2.29183800 | 2.32261100  |
| O | -2.96397800 | -3.16636200 | 2.15475600  |
| H | -1.26227800 | -2.42345700 | 3.01095200  |
| C | -3.04218300 | 0.62698100  | 0.25959400  |
| H | -2.61257200 | 1.27524300  | 1.02758000  |
| C | -4.14295900 | 1.25938300  | -0.55771500 |
| H | -4.23366600 | 0.73191400  | -1.51701500 |
| C | -3.81343400 | 2.72710800  | -0.83661000 |
| H | -3.73581500 | 3.28307300  | 0.10489600  |
| H | -4.60163800 | 3.18624200  | -1.43983700 |
| H | -2.86649500 | 2.83588900  | -1.37378900 |
| C | -5.49325700 | 1.15850400  | 0.17491800  |
| H | -5.82460800 | 0.12285000  | 0.29668900  |
| H | -6.26031200 | 1.69217700  | -0.39470400 |
| H | -5.42253500 | 1.61555900  | 1.16820000  |
| C | 5.17647700  | -1.86868400 | -0.60202100 |
| H | 5.96884300  | -2.26214000 | -1.25049200 |
| H | 4.84479200  | -2.68577900 | 0.04583900  |
| C | 4.01383900  | -1.35767500 | -1.45331800 |
| H | 3.65335800  | -2.16848200 | -2.09740900 |
| H | 4.37025200  | -0.55937300 | -2.11535800 |

|   |             |             |             |
|---|-------------|-------------|-------------|
| C | 2.85865400  | -0.83436800 | -0.60147100 |
| H | 3.23832300  | -0.06369500 | 0.08353900  |
| H | 2.46921900  | -1.64858400 | 0.02566900  |
| C | 1.72616500  | -0.26058500 | -1.45330400 |
| H | 1.42286700  | -1.00678400 | -2.19783000 |
| C | 0.49394500  | 0.12591100  | -0.62860000 |
| C | 0.78752000  | 1.08674800  | 0.53154300  |
| H | 1.37529800  | 0.54611900  | 1.28524900  |
| H | -0.15715500 | 1.36926700  | 1.01146800  |
| H | 0.06264200  | -0.78970600 | -0.21060600 |
| C | 5.80436600  | -0.77297000 | 0.26127400  |
| O | 6.07993200  | 0.32870100  | -0.29755200 |
| O | 6.02983000  | -1.02985700 | 1.48052100  |
| C | 1.53691900  | 2.34836700  | 0.12309100  |
| H | 2.51727300  | 2.11635700  | -0.29929600 |
| H | 0.97350100  | 2.90977500  | -0.62764900 |
| H | 2.09538800  | 0.61035000  | -2.01155400 |
| S | 1.77078400  | 3.51258900  | 1.51399000  |
| H | 2.47434200  | 2.67515000  | 2.29511200  |
| S | -0.77724200 | 0.80714600  | -1.77439900 |
| H | -1.85691800 | 0.72737700  | -0.79770400 |

### TS - $\gamma(1)$

Charge = -1 Multiplicity = 2

|   |             |             |             |
|---|-------------|-------------|-------------|
| N | -3.56847100 | 0.67698800  | -1.72864000 |
| H | -3.72171500 | 1.61543900  | -1.38598300 |
| H | -3.11352700 | 0.55007300  | -2.62415200 |
| C | -3.91933600 | -0.39647200 | -1.01425300 |
| O | -3.78272300 | -1.55417500 | -1.42826900 |
| C | -4.48556100 | -0.12857200 | 0.38683100  |
| H | -4.75341000 | 0.92974500  | 0.47565200  |
| N | -5.68060400 | -0.93299000 | 0.58486700  |
| H | -5.67866300 | -1.65684000 | 1.29430600  |
| C | -6.75160800 | -0.81468200 | -0.20775100 |
| O | -6.82596900 | -0.00426700 | -1.13925700 |
| H | -7.57339800 | -1.49892900 | 0.03884700  |
| C | -3.47371100 | -0.52116400 | 1.46968800  |
| H | -3.19795700 | -1.57476100 | 1.32894700  |
| H | -4.00467700 | -0.46331100 | 2.43446400  |
| C | -2.22713900 | 0.32090300  | 1.60147800  |
| C | -1.32320500 | -0.14903400 | 2.70890600  |
| H | -0.37101200 | 0.38928000  | 2.70916300  |
| H | -1.12655500 | -1.22440000 | 2.64267800  |
| H | -1.80795400 | 0.03822900  | 3.67982500  |
| C | -2.35806100 | 1.81137000  | 1.45717900  |
| H | -3.05657100 | 2.19771300  | 2.21625100  |

|   |             |             |             |
|---|-------------|-------------|-------------|
| H | -1.39424300 | 2.30409700  | 1.61273200  |
| H | -2.74027800 | 2.11690600  | 0.47939200  |
| C | 5.94203100  | -2.00033400 | 0.15107800  |
| H | 6.64441000  | -2.68174600 | -0.34428000 |
| H | 5.87115000  | -2.30369900 | 1.20002300  |
| C | 4.57110300  | -2.08746400 | -0.52137600 |
| H | 4.21535100  | -3.12385300 | -0.47918900 |
| H | 4.66601200  | -1.82585200 | -1.58208900 |
| C | 3.54343800  | -1.17109900 | 0.14045800  |
| H | 3.91480600  | -0.13732900 | 0.11361000  |
| H | 3.44346400  | -1.44257400 | 1.20091100  |
| C | 2.17433300  | -1.24931500 | -0.53535600 |
| H | 1.86346000  | -2.29934700 | -0.59456000 |
| C | 1.09156800  | -0.46458000 | 0.21500400  |
| C | 1.44226600  | 1.01056700  | 0.45080100  |
| H | 2.27483900  | 1.05873000  | 1.16503000  |
| H | 0.59078300  | 1.50961600  | 0.92546400  |
| H | 0.95009200  | -0.93692900 | 1.19282800  |
| C | 6.54732100  | -0.59771200 | 0.07705200  |
| O | 6.56533700  | -0.02725500 | -1.05275800 |
| O | 7.01216900  | -0.09069400 | 1.13977400  |
| C | 1.82498000  | 1.76677400  | -0.81441600 |
| H | 2.72314100  | 1.35213200  | -1.27792000 |
| H | 1.01748000  | 1.72407400  | -1.55092300 |
| H | 2.25450700  | -0.88658000 | -1.56892900 |
| S | 2.10180500  | 3.54998200  | -0.51680900 |
| H | 3.11979600  | 3.40535300  | 0.34861300  |
| S | -0.49186300 | -0.66161200 | -0.70464800 |
| H | -1.36590500 | -0.12111400 | 0.35114000  |

### TS - $\delta(1)$

Charge = -1 Multiplicity = 2

|   |            |             |             |
|---|------------|-------------|-------------|
| N | 2.55721200 | 0.36217700  | 1.70245700  |
| H | 1.72796000 | -0.06180100 | 1.29893800  |
| H | 2.62910900 | 0.41611200  | 2.71148100  |
| C | 3.61513000 | 0.69330900  | 0.95328500  |
| O | 4.66547600 | 1.14087500  | 1.43016200  |
| C | 3.46838500 | 0.44759400  | -0.55278400 |
| H | 2.40014000 | 0.39644900  | -0.79592200 |
| N | 4.07340500 | 1.54213300  | -1.29208000 |
| H | 4.83719400 | 1.34292900  | -1.92814300 |
| C | 3.74743000 | 2.81938600  | -1.06722000 |
| O | 2.87511900 | 3.17213000  | -0.26421200 |
| H | 4.31710100 | 3.54185800  | -1.66568900 |
| C | 4.17425500 | -0.85392100 | -0.95246900 |
| H | 5.20577800 | -0.80969500 | -0.58234000 |

|   |             |             |             |
|---|-------------|-------------|-------------|
| H | 4.21801800  | -0.88570000 | -2.04839400 |
| C | 3.50411900  | -2.14082200 | -0.45605500 |
| H | 3.39954000  | -2.08063000 | 0.63954500  |
| C | 4.40818300  | -3.34324100 | -0.75387800 |
| H | 4.57905300  | -3.43533300 | -1.83218700 |
| H | 3.94699100  | -4.27002900 | -0.40103700 |
| H | 5.37768400  | -3.22982700 | -0.25950700 |
| C | 2.14612900  | -2.33978300 | -1.08212800 |
| H | 1.73276100  | -1.56119200 | -1.72295800 |
| H | 1.85585300  | -3.35585300 | -1.34573000 |
| C | -6.18358100 | -0.76154800 | -0.51504300 |
| H | -7.15482300 | -1.05601600 | -0.09806700 |
| H | -6.14679900 | -1.12584500 | -1.54630100 |
| C | -5.05528900 | -1.37765800 | 0.31110000  |
| H | -5.18296600 | -2.46625800 | 0.34306000  |
| H | -5.12302500 | -1.01740700 | 1.34472600  |
| C | -3.67457800 | -1.04564800 | -0.25281400 |
| H | -3.57616400 | 0.04456900  | -0.34168700 |
| H | -3.58699600 | -1.45340100 | -1.26954500 |
| C | -2.54859600 | -1.60128000 | 0.61932900  |
| H | -2.71170800 | -2.67415500 | 0.77661300  |
| C | -1.15960300 | -1.40500200 | 0.00455300  |
| C | -0.82838300 | 0.05443700  | -0.33326700 |
| H | -1.45249300 | 0.37267700  | -1.17710000 |
| H | 0.21204200  | 0.10785100  | -0.67851100 |
| H | -1.10335500 | -1.99058100 | -0.91984900 |
| C | -6.15385200 | 0.76841400  | -0.52800700 |
| O | -5.95181800 | 1.36323200  | 0.57067100  |
| O | -6.35694600 | 1.35654200  | -1.63075700 |
| C | -1.03284600 | 1.01728700  | 0.83066700  |
| H | -2.09448300 | 1.12492500  | 1.07110000  |
| H | -0.52659800 | 0.66430900  | 1.73361300  |
| H | -2.58904400 | -1.12868800 | 1.61023400  |
| S | -0.46477000 | 2.71293500  | 0.45559500  |
| H | 0.83204500  | 2.41655400  | 0.24486900  |
| S | 0.09151300  | -2.13631100 | 1.14715600  |
| H | 1.11891600  | -2.23334100 | 0.12363300  |

**TS -  $\alpha(2)$**

Charge = -1 Multiplicity = 2

|   |            |             |             |
|---|------------|-------------|-------------|
| N | 3.87254900 | -2.25709100 | 0.45116200  |
| H | 3.67716100 | -2.38007400 | -0.53388000 |
| H | 4.62242500 | -2.79494300 | 0.86676300  |
| C | 3.30661500 | -1.27168300 | 1.16396300  |
| O | 3.59122200 | -1.04974200 | 2.34648400  |
| C | 2.33361700 | -0.39295500 | 0.40300500  |

|   |             |             |             |
|---|-------------|-------------|-------------|
| N | 1.38733000  | 0.26148800  | 1.20338700  |
| H | 1.11003600  | 1.22481900  | 0.97415100  |
| C | 0.64918300  | -0.33826300 | 2.17288800  |
| O | 0.72868600  | -1.52645600 | 2.47785300  |
| H | -0.05267600 | 0.35211900  | 2.66078400  |
| C | 2.99734000  | 0.49392700  | -0.64505100 |
| H | 4.01996000  | 0.13736200  | -0.80068700 |
| H | 3.07239800  | 1.50490800  | -0.21603200 |
| C | 2.30716200  | 0.59772200  | -2.01566300 |
| H | 2.27099000  | -0.40907800 | -2.45033800 |
| C | 3.14741300  | 1.49101700  | -2.92623000 |
| H | 3.21883300  | 2.50359700  | -2.51135200 |
| H | 2.69501400  | 1.56595400  | -3.92007400 |
| H | 4.16333000  | 1.09969300  | -3.04306100 |
| C | 0.88413500  | 1.13352700  | -1.89745500 |
| H | 0.26773700  | 0.50446100  | -1.24833400 |
| H | 0.39978900  | 1.17064800  | -2.87921500 |
| H | 0.88981100  | 2.14849000  | -1.48062500 |
| C | -2.04948100 | 3.61429000  | 0.69928300  |
| H | -2.20602200 | 4.34553900  | 1.50295000  |
| H | -2.52925100 | 4.02035200  | -0.19693700 |
| C | -2.67952500 | 2.27837700  | 1.08545800  |
| H | -3.73321400 | 2.44497500  | 1.33989500  |
| H | -2.19215100 | 1.88849700  | 1.98781200  |
| C | -2.59105800 | 1.23700600  | -0.03003000 |
| H | -1.53431400 | 1.06083200  | -0.27158100 |
| H | -3.06235300 | 1.63487600  | -0.93968700 |
| C | -3.26730400 | -0.07697700 | 0.36178100  |
| H | -4.29025100 | 0.13765300  | 0.69459300  |
| C | -3.33417700 | -1.09495300 | -0.78182000 |
| C | -1.97033000 | -1.46399100 | -1.38257200 |
| H | -1.60789600 | -0.60914300 | -1.96736400 |
| H | -2.10023900 | -2.29439100 | -2.08578600 |
| H | -3.96030400 | -0.68206300 | -1.57846200 |
| C | -0.53988700 | 3.56834800  | 0.46085800  |
| O | 0.15347400  | 2.78661700  | 1.18043900  |
| O | -0.05708500 | 4.34566600  | -0.40858700 |
| C | -0.93482600 | -1.81784800 | -0.32206300 |
| H | -0.69949800 | -0.92510900 | 0.26050500  |
| H | -1.31933800 | -2.57296300 | 0.36852500  |
| H | -2.74164300 | -0.51356100 | 1.22288500  |
| S | 0.63654700  | -2.43169800 | -1.02964400 |
| H | 1.54612200  | -1.40875800 | -0.34095200 |
| S | -4.22168000 | -2.57619000 | -0.12998800 |
| H | -4.26512500 | -3.25319000 | -1.28984800 |

TS -  $\beta(2)$

Charge = -1 Multiplicity = 2

|   |             |             |             |
|---|-------------|-------------|-------------|
| N | -4.77853700 | -0.89624200 | 0.48343600  |
| H | -4.73301200 | -1.79103600 | 0.01533100  |
| H | -5.60698400 | -0.66224100 | 1.01671200  |
| C | -3.81084500 | 0.01566400  | 0.34321800  |
| O | -3.87584300 | 1.14930300  | 0.83024300  |
| C | -2.55179200 | -0.44353000 | -0.42662500 |
| H | -2.82056100 | -1.32808000 | -1.01889700 |
| N | -2.11626500 | 0.61144200  | -1.31938200 |
| H | -1.32283000 | 1.22014400  | -1.05547900 |
| C | -2.91719700 | 1.03511100  | -2.30040700 |
| O | -4.00666200 | 0.51419800  | -2.58393700 |
| H | -2.52359700 | 1.89663400  | -2.85659400 |
| C | -1.45476700 | -0.77545800 | 0.55850700  |
| H | -0.80545000 | 0.06970800  | 0.80699000  |
| C | -1.72011400 | -1.75081900 | 1.67774100  |
| H | -2.54304800 | -1.32069300 | 2.27616300  |
| C | -0.50001200 | -1.87764100 | 2.58975200  |
| H | 0.32270300  | -2.36962300 | 2.05875600  |
| H | -0.74268400 | -2.48333600 | 3.46792800  |
| H | -0.15378900 | -0.89713600 | 2.93255900  |
| C | -2.16426800 | -3.13763900 | 1.19620900  |
| H | -3.00101300 | -3.10190600 | 0.49347000  |
| H | -2.47183500 | -3.74624100 | 2.05151800  |
| H | -1.33211000 | -3.65024700 | 0.70132100  |
| C | 1.16402800  | 3.63746400  | 0.92361600  |
| H | 1.07333100  | 4.69167000  | 0.63230900  |
| H | 1.13507300  | 3.60663000  | 2.01764000  |
| C | 2.46880500  | 3.04988700  | 0.39516200  |
| H | 3.31536500  | 3.64801500  | 0.75165000  |
| H | 2.47176600  | 3.11375400  | -0.69915400 |
| C | 2.64885300  | 1.59029200  | 0.81350500  |
| H | 1.69593800  | 1.06474100  | 0.66920000  |
| H | 2.87782300  | 1.53251300  | 1.88608500  |
| C | 3.74269100  | 0.89136600  | 0.00880000  |
| H | 4.69987600  | 1.40122200  | 0.17314600  |
| C | 3.89455800  | -0.58914100 | 0.36630400  |
| C | 2.59191600  | -1.39177400 | 0.24941300  |
| H | 1.93005200  | -1.08564000 | 1.06872900  |
| H | 2.80804100  | -2.45465200 | 0.40626800  |
| H | 4.25506100  | -0.66973300 | 1.39621800  |
| C | -0.08136900 | 2.92653300  | 0.39042100  |
| O | -0.03276200 | 2.43491700  | -0.77975100 |
| O | -1.10192800 | 2.88516000  | 1.13100200  |
| C | 1.86083500  | -1.21071000 | -1.07668200 |



|   |             |             |             |
|---|-------------|-------------|-------------|
| H | 1.50309700  | -0.18414300 | -1.20563600 |
| H | 2.52356800  | -1.43519300 | -1.91853400 |
| H | 3.51362400  | 0.98826100  | -1.06126500 |
| S | 0.43001900  | -2.33255100 | -1.26489500 |
| H | -0.45011300 | -1.59631500 | -0.36408400 |
| S | 5.22560400  | -1.27078200 | -0.71391300 |
| H | 5.26497500  | -2.49638200 | -0.16387600 |

### TS - $\gamma(2)$

Charge = -1 Multiplicity = 2

|   |             |             |             |
|---|-------------|-------------|-------------|
| N | 4.21301700  | 1.38846200  | 0.57335000  |
| H | 3.52043500  | 2.03726200  | 0.22345700  |
| H | 4.92093600  | 1.72229600  | 1.21569000  |
| C | 4.18959200  | 0.09757100  | 0.22760700  |
| O | 5.02490100  | -0.72601800 | 0.62240300  |
| C | 3.01872400  | -0.33303400 | -0.65976900 |
| H | 2.53191300  | 0.55994300  | -1.06713200 |
| N | 3.50189800  | -1.15900700 | -1.75284800 |
| H | 3.16780500  | -2.11252000 | -1.83481000 |
| C | 4.45285200  | -0.73966400 | -2.59524900 |
| O | 4.96986900  | 0.38240900  | -2.53859200 |
| H | 4.73948900  | -1.48015400 | -3.35280300 |
| C | 2.00220100  | -1.16277100 | 0.15050200  |
| H | 2.49828800  | -2.08106900 | 0.48769700  |
| H | 1.20855100  | -1.44577600 | -0.55309400 |
| C | 1.39616100  | -0.44358800 | 1.33038500  |
| C | 2.12165200  | -0.50531700 | 2.64735900  |
| H | 1.45749700  | -0.21494800 | 3.46826400  |
| H | 2.97339700  | 0.18994200  | 2.66287800  |
| H | 2.50757600  | -1.51073700 | 2.84420500  |
| C | 0.62003200  | 0.81196100  | 1.04951800  |
| H | 0.11186300  | 0.76887700  | 0.08065600  |
| H | -0.12304400 | 1.00195300  | 1.83297800  |
| H | 1.29147200  | 1.68437600  | 1.03390400  |
| C | -2.56578200 | 3.65043800  | -0.71437900 |
| H | -3.10368900 | 4.59851800  | -0.58714500 |
| H | -2.06348700 | 3.69285100  | -1.68592100 |
| C | -3.54880300 | 2.48206100  | -0.67365800 |
| H | -4.31771100 | 2.63071900  | -1.44132700 |
| H | -4.06373400 | 2.46796200  | 0.29445800  |
| C | -2.85538000 | 1.14011900  | -0.90038500 |
| H | -2.06178500 | 1.02104900  | -0.15198700 |
| H | -2.36501500 | 1.14357500  | -1.88415700 |
| C | -3.82228400 | -0.03894000 | -0.81308900 |
| H | -4.67068500 | 0.14087700  | -1.48503800 |
| C | -3.17192300 | -1.37223600 | -1.19252800 |

|   |             |             |             |
|---|-------------|-------------|-------------|
| C | -1.92336300 | -1.72702000 | -0.37361700 |
| H | -1.11570900 | -1.04458700 | -0.66990700 |
| H | -1.59381700 | -2.73585000 | -0.64662100 |
| H | -2.88566300 | -1.33120900 | -2.24786300 |
| C | -1.50234200 | 3.60158100  | 0.38583400  |
| O | -1.86404700 | 3.25253500  | 1.54662200  |
| O | -0.32226200 | 3.94427300  | 0.07961300  |
| C | -2.12278600 | -1.64484900 | 1.13564700  |
| H | -2.25262600 | -0.60934300 | 1.46438300  |
| H | -3.01974000 | -2.19778200 | 1.43399300  |
| H | -4.23140400 | -0.09915200 | 0.20450700  |
| S | -0.76038600 | -2.39450600 | 2.09631600  |
| H | 0.28657400  | -1.43778700 | 1.67268900  |
| S | -4.47840700 | -2.66753900 | -1.05101900 |
| H | -3.73041100 | -3.69621700 | -1.48566200 |

### TS - $\delta(2)$

Charge = -1 Multiplicity = 2

|   |             |             |             |
|---|-------------|-------------|-------------|
| N | -4.26147800 | -0.30706600 | 1.69071700  |
| H | -3.42968200 | 0.21354200  | 1.95273900  |
| H | -4.99812700 | -0.43998400 | 2.37293000  |
| C | -4.35114400 | -0.91194700 | 0.50164100  |
| O | -5.30401800 | -1.63302300 | 0.17812000  |
| C | -3.21465600 | -0.61423500 | -0.48240100 |
| H | -2.37540900 | -0.18964900 | 0.07562100  |
| N | -2.77131700 | -1.84477000 | -1.11438600 |
| H | -2.83775700 | -1.94034500 | -2.12120900 |
| C | -2.30063400 | -2.87142600 | -0.39818700 |
| O | -2.21153700 | -2.86009500 | 0.83615800  |
| H | -1.99275000 | -3.73780000 | -0.99824500 |
| C | -3.68270800 | 0.36874400  | -1.56002600 |
| H | -4.62673200 | 0.00082300  | -1.97869700 |
| H | -2.94033200 | 0.36181100  | -2.36857000 |
| C | -3.85202400 | 1.81290600  | -1.07660300 |
| H | -4.48531700 | 1.82908600  | -0.17708900 |
| C | -4.57552400 | 2.63323400  | -2.15952800 |
| H | -3.98938100 | 2.64450500  | -3.08505300 |
| H | -4.72166200 | 3.66611600  | -1.83246800 |
| H | -5.55529100 | 2.19617400  | -2.37669100 |
| C | -2.53333300 | 2.47022700  | -0.76937800 |
| H | -1.64331400 | 2.10208100  | -1.28165000 |
| H | -2.55165600 | 3.54403100  | -0.58635200 |
| C | 6.17655300  | 0.47085800  | -1.26984800 |
| H | 6.78119100  | 1.23140900  | -1.78092600 |
| H | 6.17326700  | -0.41352100 | -1.91541700 |
| C | 4.75722900  | 0.98776200  | -1.05634900 |

|   |             |             |             |
|---|-------------|-------------|-------------|
| H | 4.34607600  | 1.31507400  | -2.01931100 |
| H | 4.78319500  | 1.86991900  | -0.40578800 |
| C | 3.83171300  | -0.06593400 | -0.44942500 |
| H | 4.25022800  | -0.42079900 | 0.50254200  |
| H | 3.79514900  | -0.93371100 | -1.12106500 |
| C | 2.42434800  | 0.47673900  | -0.20644200 |
| H | 1.94802600  | 0.73309200  | -1.16351500 |
| C | 1.50087000  | -0.45582500 | 0.57655700  |
| C | 0.09580500  | 0.11950900  | 0.76885000  |
| H | -0.52614700 | -0.62025500 | 1.28743700  |
| H | -0.35053700 | 0.29341900  | -0.21910200 |
| H | 1.94729200  | -0.66037900 | 1.55620000  |
| C | 6.92940400  | 0.12878900  | 0.01839200  |
| O | 6.66954100  | 0.79250900  | 1.06251000  |
| O | 7.80870500  | -0.78139900 | -0.04705800 |
| C | 0.08568500  | 1.41894200  | 1.57082300  |
| H | 0.65179600  | 1.30236300  | 2.50070100  |
| H | 0.53278700  | 2.24275800  | 1.01056900  |
| H | 2.50993400  | 1.40896300  | 0.36574600  |
| S | -1.59246200 | 1.93830000  | 2.08985600  |
| S | 1.39205300  | -2.06744700 | -0.31908600 |
| H | -2.09585900 | 2.15335300  | 0.73943700  |
| H | 0.38609100  | -2.57685000 | 0.41429400  |

### N-formyl-leucinamide

Charge = 0 Multiplicity = 1

|   |             |             |             |
|---|-------------|-------------|-------------|
| N | -1.42379500 | -1.33235000 | -0.06455900 |
| C | -0.39215700 | -0.35427300 | 0.23811200  |
| C | -0.71897200 | 0.97696400  | -0.44445000 |
| C | 0.95089800  | -0.88654000 | -0.27705000 |
| N | -0.53017100 | 2.07447000  | 0.29573700  |
| O | -1.08589500 | 1.01621300  | -1.62618100 |
| C | 2.16058600  | 0.02399700  | -0.04309300 |
| C | 3.38608300  | -0.59459600 | -0.71622700 |
| C | 2.43448800  | 0.24970700  | 1.44452700  |
| C | -2.71371600 | -1.10594900 | 0.20441400  |
| O | -3.12904900 | -0.07315600 | 0.74514300  |
| H | -1.16990500 | -2.18392600 | -0.55241900 |
| H | -0.35946900 | -0.19830300 | 1.32163100  |
| H | 0.84222000  | -1.07754500 | -1.35230300 |
| H | 1.13354600  | -1.85279700 | 0.21143100  |
| H | -0.25193300 | 2.01146500  | 1.26576500  |
| H | -0.66328600 | 2.98756100  | -0.12051800 |
| H | 1.96819900  | 0.99571300  | -0.51887000 |
| H | 4.26328400  | 0.04835400  | -0.59469500 |
| H | 3.21830500  | -0.74538100 | -1.78749800 |

|   |             |             |             |
|---|-------------|-------------|-------------|
| H | 3.61681200  | -1.56893700 | -0.26890200 |
| H | 3.34400500  | 0.84368600  | 1.57921900  |
| H | 2.57992400  | -0.71150000 | 1.95257700  |
| H | 1.61919900  | 0.77671800  | 1.95011200  |
| H | -3.38685800 | -1.92027200 | -0.09287000 |

### Dihydrolipoate radical S(1)

Charge = -1 Multiplicity = 2

|   |             |             |             |
|---|-------------|-------------|-------------|
| C | 3.48597200  | -0.97548700 | -0.25336000 |
| H | 4.25092200  | -1.27832100 | -0.97873000 |
| H | 3.66863700  | -1.53055100 | 0.67170700  |
| C | 2.09465300  | -1.29547000 | -0.80199100 |
| H | 2.03745300  | -2.36358700 | -1.04300500 |
| H | 1.93975000  | -0.74913800 | -1.74021600 |
| C | 0.98381000  | -0.93867900 | 0.18508600  |
| H | 1.09771200  | 0.11020500  | 0.49131500  |
| H | 1.09641100  | -1.54510900 | 1.09498700  |
| C | -0.40831800 | -1.15740300 | -0.40796200 |
| H | -0.46333100 | -2.16432600 | -0.83847100 |
| C | -1.54051600 | -1.01368000 | 0.61350400  |
| C | -1.52442600 | 0.31822300  | 1.37660200  |
| H | -0.62294700 | 0.35609000  | 2.00049200  |
| H | -2.38413900 | 0.35873100  | 2.05333000  |
| H | -1.43548100 | -1.80884100 | 1.36612300  |
| C | 3.68300300  | 0.51807400  | 0.01165700  |
| O | 3.36764400  | 1.32163500  | -0.91438900 |
| O | 4.16013900  | 0.87140500  | 1.12985100  |
| C | -1.51311400 | 1.55463700  | 0.48574400  |
| H | -1.51516300 | 2.45996700  | 1.09610500  |
| H | -0.62184400 | 1.58646000  | -0.14670900 |
| H | -0.56940000 | -0.45659000 | -1.23827600 |
| S | -2.91769100 | 1.64428800  | -0.67937200 |
| S | -3.17367600 | -1.34571000 | -0.12479200 |
| H | -3.88755200 | 1.74105500  | 0.24679200  |

### Dihydrolipoate radical S(2)

Charge = -1 Multiplicity = 2

|   |            |             |             |
|---|------------|-------------|-------------|
| C | 3.52006700 | -0.96826600 | -0.19479100 |
| H | 4.28324300 | -1.29267400 | -0.91250100 |
| H | 3.70305600 | -1.49690100 | 0.74546500  |
| C | 2.12798000 | -1.30417400 | -0.73182500 |
| H | 2.06538500 | -2.38230800 | -0.92142400 |
| H | 1.97675100 | -0.80143400 | -1.69462700 |
| C | 1.01946700 | -0.89350900 | 0.23644300  |
| H | 1.11187100 | 0.17848700  | 0.45534300  |
| H | 1.15080700 | -1.42446300 | 1.18949900  |

|   |             |             |             |
|---|-------------|-------------|-------------|
| C | -0.37098200 | -1.18488500 | -0.32666000 |
| H | -0.41707600 | -2.23057700 | -0.65394100 |
| C | -1.49272300 | -0.94643800 | 0.68652000  |
| C | -1.50354900 | 0.45264600  | 1.31022500  |
| H | -0.58324000 | 0.56748400  | 1.89520100  |
| H | -2.33970700 | 0.53357800  | 2.01254400  |
| H | -1.39220600 | -1.67196400 | 1.49994300  |
| C | 3.71811400  | 0.53179400  | 0.02910000  |
| O | 3.40618200  | 1.31030400  | -0.91909600 |
| O | 4.19176100  | 0.91418600  | 1.13907300  |
| C | -1.57210200 | 1.59116900  | 0.29391400  |
| H | -1.48072500 | 2.54157400  | 0.83081400  |
| H | -0.74530400 | 1.52792500  | -0.41827200 |
| H | -0.53906600 | -0.56717500 | -1.21956800 |
| S | -3.15779800 | 1.66500800  | -0.59146000 |
| S | -3.13176700 | -1.32560500 | -0.07432500 |
| H | -2.72246600 | -1.36536400 | -1.35333800 |
